# Supplementary material for: Family expansion and gene rearrangements contributed to the functional specialization of PRDM genes in vertebrates
Source: PubMed Central journal article supplement (PMC2082429; doi:10.1186/1471-2148-7-187), 2007-10-04
Supplement: 1471-2148-7-187-S1.pdf [file 1471-2148-7-187-S1.pdf]

**Additional file1: PRDM orthologs in representatives of metazoans.**

| Gene   | Hs (17)    |     | Pt (17)    |     | Mmu (17)   |     | Mm (16)      |     | Rn (16)    |     | Gg (16)    |     | Xt (16)      |     | Fr (15)    |     |
|--------|------------|-----|------------|-----|------------|-----|--------------|-----|------------|-----|------------|-----|--------------|-----|------------|-----|
|        | Identifier | ZnF | Identifier | ZnF | Identifier | ZnF | Identifier   | ZnF | Identifier | ZnF | Identifier | ZnF | Identifier   | ZnF | Identifier | ZnF |
| PRDM1  | NP_001189  | 5   | PRDM1_pt   | 5   | PRDM1_mmu  | 5   | NP_031574    | 5   | XP_228320  | 5   | PRDM1_gg   | 5   | BC080145     | 5   | Q75UA3     | 5   |
| PRDM2  | NP_056950  | 8   | PRDM2_pt   | 8   | PRDM2_mmu  | 8   | XP_204027    | 8   | Q63755     | 8   | PRDM2_gg   | 8   | PRDM2_xt     | 8   | PRDM2_fr   | 8   |
| PRDM3  | NP_005232  | 10  | PRDM3_pt   | 10  | PRDM3_mmu  | 10  | PRDM3_mm     | 10  | PRDM3_rn   | 10  | PRDM3_gg   | 10  | PRDM3_xt     | 8   | PRDM3_fr   | 10  |
| PRDM4  | NP_036538  | 7   | PRDM4_pt   | 7   | PRDM4_mmu  | 7   | NP_857633    | 7   | NP_579846  | 7   | PRDM4_gg   | 7   | NP_001072257 | 7   | PRDM4_fr   | 7   |
| PRDM5  | NP_061169  | 16  | PRDM5_pt   | 16  | PRDM5_mmu  | 14  | NP_081823    | 15  | PRDM5_rn   | 13  | XP_420628  | 16  | PRDM5_xt     | 15  | PRDM5_fr   | 16  |
| PRDM6  | XP_932740  | 4   | PRDM6_pt   | 4   | PRDM6_mmu  | 4   | NP_001028453 | 4   | PRDM6_rn   | 4   | PRDM6_gg   | 4   | PRDM6_xt     | 4   | PRDM6_fr   | *   |
| PRDM7  | NP_443722  | 4   | PRDM7_pt   | 3   | PRDM7_mmu  | 3   | Meisetz      | 13  | XP_344848  | 11  | PRDM7/9_gg | 13  | PRDM7/9_xt   | *   | PRDM7/9_fr | 11  |
| PRDM8  | NP_064611  | 3   | PRDM8_pt   | 3   | PRDM8_mmu  | 3   | NP_084223    | 2   | XP_223205  | 1   | PRDM8_gg   | *   | NP_001039151 | 2   | PRDM8_fr   | 2   |
| PRDM9  | NP_064612  | 14  | PRDM9_pt   | 14  | PRDM9_mmu  | 10  | Meisetz      | 13  | XP_344848  | 11  | PRDM7/9_gg | 13  | PRDM7/9_xt   | *   | PRDM7/9_fr | 11  |
| PRDM10 | NP_955470  | 10  | PRDM10_pt  | 9   | PRDM10_mmu | 10  | XP_356146    | 10  | XP_576373  | 9   | PRDM10_gg  | 10  | PRDM10_xt    | 10  | PRDM10_fr  | 10  |
| PRDM11 | NP_064614  | --- | PRDM11_pt  | --- | PRDM11_mmu | --- | XP_921193    | --- | XP_215777  | --- | PRDM11_gg  | --- | PRDM11_xt    | --- | PRDM11_fr  | --- |
| PRDM12 | NP_067632  | 3   | PRDM12_pt  | 3   | PRDM12_mmu | 3   | XP_355325    | 3   | PRDM12_rn  | 3   | XP_415465  | 3   | PRDM12_xt    | *   | PRDM12_fr  | 3   |
| PRDM13 | NP_067633  | 4   | PRDM13_pt  | 4   | PRDM13_mmu | 4   | XP_889460    | 4   | XP_345510  | 3   | PRDM13_gg  | *   | PRDM13_xt    | 4   | PRDM13_fr  | 4   |
| PRDM14 | NP_078780  | 6   | PRDM14_pt  | 6   | PRDM14_mmu | 6   | XP_918536    | 6   | PRDM14_rn  | 3*  | PRDM14_gg  | 6   | PRDM14_xt    | 6   | PRDM14_fr  | 3*  |
| PRDM15 | NP_071398  | 17  | PRDM15_pt  | 2*  | PRDM15_mmu | 17  | XP_912670    | 17  | XP_239504  | 16  | XP_416740  | 17  | PRDM15_xt    | 17  | PRDM15_fr  | 15  |
| PRDM16 | NP_071397  | 10  | PRDM16_pt  | 10  | PRDM16_mmu | 10  | NP_081780    | 10  | PRDM16_rn  | *   | XP_417551  | 5   | PRDM16_xt    | 10  | PRDM16_fr  | 10  |
| PRDM17 | NP_079017  | 10  | PRDM17_pt  | 10  | PRDM17_mmu | 10  | XP_929048    | 10  | XP_230283  | 10  | PRDM17_gg  | 8   | PRDM17_xt    | 10  | ---        | --- |

| Ci (2)     |     | Dm (3)                    |     | Dp (3)                |     | Ce (2)                  |     | Cb (2)           |     |
|------------|-----|---------------------------|-----|-----------------------|-----|-------------------------|-----|------------------|-----|
| Identifier | ZnF | Identifier                | ZnF | Identifier            | ZnF | Identifier              | ZnF | Identifier       | ZnF |
| AK117075   | 5   | CG5249 (PRDM1; chr. 3L)   | 5   | PRDM_dp_chrXR (PRDM1) | 5   | F25D7.3 (PRDM1, chr. I) | 5   | CBG02201 (PRDM1) | 5   |
| AK114889   | 7   | CG9817 (PRDM5; chr. X)    | 6   | PRDM_dp_chrXL (PRDM5) | 6   | T21B10.5 (chr. II)      | --  | Cb25.fpc0058     | --  |
| ---        |     | CG31753 (Hamlet, chr. 2L) | 9   | Hamlet_dp_chr4        | 9   | ---                     | --  | ---              | --  |

**Legend:** Where present, the accession numbers of the corresponding proteins in the database are reported. The sequences assembled directly from our predictions, have been named using the PRDM protein number followed by the abbreviation of the species. Human PRDM7 and PRDM9 are co-orthologs of the same protein in non-primate species. In the case of PRDM17 in fugu only the Zn-Finger region could be predicted. Abbreviations: Hs=*Homo sapiens*; Pt=*Pan troglodytes*; Mmu=*Macaca mulatta*; Mm=*Mus musculus*; Rn=*Rattus norvegicus*; Gg=*Gallus gallus*; Xt=*Xenopus tropicalis*; Fr=*Fugu rubripes*. \*: The correct number of Zinc-Fingers could not be predicted due to the presence of gaps in the corresponding genome assembly.
